# Supplementary material for: CD11c-CD8 Spatial Cross Presentation: A Novel Approach to Link Immune Surveillance and Patient Survival in Soft Tissue Sarcoma
Source: Cancers (Basel). 2021 Mar 9;13(5):1175. doi: 10.3390/cancers13051175 (PMC7967210; doi:10.3390/cancers13051175)
Supplement: Supplementary file 1 [file cancers-13-01175-s001.zip › Supplementary Tables S1 S2.xlsx]

## Sheet: Table S1 ITGAX
Sarcoma (TCGA, PanCancer Atlas)
https://www.cbioportal.org (accessed date February 2021)
Samples with mRNA data (RNA Seq V2) (253 patients/samples) - ITGAX
Correlated Gene	Cytoband	Spearman's Correlation	p-Value	q-Value
APOBR	16p12.1	0.8496756581316659	1.021957435813934e-71	2.059959603370147e-67
CLEC7A	12p13.2	0.8338016542398601	1.0452741555451208e-66	1.05347955766615e-62
CD300LF	17q25.1	0.8102077655312846	3.6394991369344415e-60	2.4453794701062514e-56
PTPN7	1q32.1	0.8050340051367091	7.476245991195423e-59	3.767467261113154e-55
HLA-DRA	6p21.32	0.7978409813397833	4.310735471670364e-57	1.7378298980491906e-53
CYTIP	2q24.1	0.7960143816015091	1.1759460066919832e-56	3.9505906094817177e-53
FGR	1p35.3	0.7854349234013736	3.2361978616030406e-54	8.92685297955516e-51
HLA-DPB1	6p21.32	0.7852593030614256	3.542929197620741e-54	8.92685297955516e-51
ADAM8	10q26.3	0.7815268150769691	2.379840312399434e-53	5.330049019670599e-50
HLA-DPA1	6p21.32	0.7799884698207192	5.161126593052899e-53	1.040328287361673e-49
MYO1G	7p13	0.7786539034399352	1.00511291797536e-52	1.8418237352390302e-49
SLAMF8	1q23.2	0.7774571656803763	1.820032329123986e-52	3.0571993048460157e-49
CD74	5q33.1	0.7764953293881742	2.9252840819316353e-52	4.535765479961228e-49
CD300LB	17q25.1	0.7761695707637765	3.433478677741702e-52	4.943473550517106e-49
CD48	1q23.3	0.7718625092812006	2.7836966699587624e-51	3.740731585090585e-48
BIN2	12q13.13	0.7678306516033317	1.8946707089009143e-50	2.386929842457233e-47
CIITA	16p13.13	0.7676839308129959	2.0301359539023984e-50	2.407144142518273e-47
HLA-DRB1	6p21.32	0.7656068683114217	5.367128070743914e-50	6.01028891788806e-47
CD37	19q13.33	0.7569021757655783	2.836000280937546e-48	3.0086977717293745e-45
PTPN22	1p13.2	0.7545672403597771	7.990124086602883e-48	8.052846560682716e-45
PARVG	22q13.31	0.7533979201216445	1.3364095511440517e-47	1.2827622534481262e-44
HLA-DQB1	6p21.32	0.7527147051282616	1.8025268794999684e-47	1.6515242868218574e-44
CCR5	3p21.31	0.751899589626395	2.5725030456722386e-47	2.2545192996354484e-44
CD52	1p36.11	0.7515920687779645	2.9408900431075322e-47	2.469980024954939e-44
HLA-DQA1	6p21.32	0.7510681718144909	3.692341118106525e-47	2.9770607967069285e-44
IFI30	19p13.11	0.7493823647538131	7.64947783982109e-47	5.795140851626143e-44
EVI2B	17q11.2	0.749348278105553	7.762504489453085e-47	5.795140851626143e-44
OSCAR	19q13.42	0.7478388323989146	1.4827187052402512e-46	1.0673986050545625e-43
LAT2	7q11.23	0.7466695121607824	2.440137200288436e-46	1.6960636395246209e-43
SIGLEC10	19q13.41	0.7457439855591169	3.612608919492716e-46	2.4273119330071556e-43
IL2RG	Xq13.1	0.7449377622263617	5.077629183052991e-46	3.3016055304128754e-43
ADAM28	8p21.2	0.7441952661055712	6.939425051246845e-46	4.371187211186958e-43
SPN	16p11.2	0.742872555950269	1.2073642939377034e-45	7.374800628152208e-43
HLA-DMA	6p21.32	0.7392452919669625	5.418633441888109e-45	3.212452773180547e-42
LYZ	12q15	0.7386346963546553	6.959617250928344e-45	4.0081429979132183e-42
BTK	Xq22.1	0.7350052093290707	3.0371434908927905e-44	1.7005472596090548e-41
HLA-DMB	6p21.32	0.7338470043023272	4.835526589726223e-44	2.6343164721381483e-41
SLAMF7	1q23.3	0.7302301145163177	2.0344002889307674e-43	1.0791422795783548e-40
DNAJC5B	8q13.1	0.7296044110717879	2.6023119596586546e-43	1.3449949274574231e-40
GPR65	14q31.3	0.7287369711197166	3.6567689708226105e-43	1.842737303621784e-40
CATSPER1	11q13.1	0.7283245068766248	4.296809418409248e-43	2.1124582304115904e-40
DENND1C	19p13.3	0.727838862039479	5.1934751074848476e-43	2.4924970890850493e-40
KLHL6	3q27.1	0.7252608740113016	1.4107215415852175e-42	6.613003282263542e-40
LAPTM5	1p35.2	0.7242366903631204	2.0916301914146158e-42	9.582043129169184e-40
PIK3R5	17p13.1	0.7232238262707279	3.0823401832778615e-42	1.38068291276293e-39
CD86	3q13.33	0.722441315388935	4.153995442126662e-42	1.820262741890155e-39
TFEC	7q31.2	0.7220167143138728	4.8819674415558634e-42	2.0937408025413093e-39
SEMA4A	1q22	0.7210445038243739	7.0579558725228e-42	2.963900344217543e-39
HLA-DRB5	6p21.32	0.7200382066866151	1.0319555133611114e-41	4.245128016902025e-39
CSF2RA	Xp22.33 and Yp11.2	0.7174772619825682	2.6932807760803715e-41	1.0857692120690409e-38
TRAF3IP3	1q32.2	0.7173780989909919	2.7946072963327215e-41	1.1045274367093857e-38
PTPRC	1q31.3-q32.1	0.7168866737507614	3.355096871680836e-41	1.3005516854321273e-38
MYO1F	19p13.2	0.716008572051023	4.646580608160628e-41	1.767191043748939e-38
SELPLG	12q24.11	0.7154579985802171	5.695563944998857e-41	2.1260274525804068e-38
ERMN	2q24.1	0.713459748487977	1.1875000394471193e-40	4.3520796900246516e-38
HAVCR2	5q33.3	0.7132438484715099	1.285129057161719e-40	4.62577614378728e-38
HLA-DOA	6p21.32	0.7128659312842804	1.47547887205544e-40	5.217759232284475e-38
CSF3R	1p34.3	0.710623622640055	3.3332317283921964e-40	1.1584129646414053e-37
SASH3	Xq26.1	0.7098418527723559	4.4204787547791276e-40	1.510230343391235e-37
ADAMDEC1	8p21.2	0.7080666091119814	8.363184191247958e-40	2.8096117290497515e-37
ITGB2	21q22.3	0.7077529340452999	9.355835983143266e-40	3.0915669821675216e-37
FPR3	19q13.41	0.7069696821494154	1.237180605409057e-39	4.022233784391994e-37
CARD11	7p22.2	0.7066199234977052	1.4011749053969523e-39	4.48309247112482e-37
SLAMF6	1q23.2-q23.3	0.7043210577533644	3.161075159559806e-39	9.955904998632346e-37
ARHGAP30	1q23.3	0.7040723170473258	3.450347830511577e-39	1.0699794033787978e-36
BCL2A1	15q25.1	0.7027925857093948	5.4061281965448675e-39	1.6510806978447713e-36
ADGRE2	19p13.12	0.7026473469472438	5.6879267375804236e-39	1.7112170037225164e-36
CLEC4A	12p13.31	0.7024398630013139	6.115838423402876e-39	1.812896398537232e-36
RAC2	22q13.1	0.7011260450151242	9.667175616286369e-39	2.8240762159055706e-36
RASAL3	19p13.12	0.7008200061948773	1.0751322805347276e-38	3.0959201969626434e-36
CD53	1p13.3	0.6996919418592943	1.5889517027894236e-38	4.5110562638206216e-36
LPXN	11q12.1	0.6993347730004914	1.7974619882502625e-38	5.032144624605631e-36
ICOS	2q33.2	0.698824722619328	2.1428531673917334e-38	5.916916615769202e-36
TBC1D10C	11q13.2	0.6964117133579647	4.897141459288766e-38	1.3339416269578873e-35
RHOH	4p14	0.6957418366182491	6.151193083443686e-38	1.653194653106325e-35
CD84	1q23.3	0.6955432448414295	6.58053927427131e-38	1.7290119206650442e-35
CD3D	11q23.3	0.6955323873297398	6.604847839024082e-38	1.7290119206650442e-35
RGS1	1q31.2	0.694517681337263	9.315434349189538e-38	2.407323207392481e-35
LY9	1q23.3	0.6939490064286619	1.1288259857426647e-37	2.8802209360272015e-35
CST7	20p11.21	0.6937855594137694	1.1928024911262496e-37	3.005414976703977e-35
WAS	Xp11.23	0.6925332455972646	1.8175063332248633e-37	4.5228981677547617e-35
KMO	1q43	0.6909949003410145	3.0400730821816994e-37	7.473018672870306e-35
EVI2A	17q11.2	0.690298347093965	3.833386058612521e-37	9.309585877524408e-35
DAPP1	4q23	0.6886540368224724	6.6095046200236755e-37	1.5771225990549117e-34
C16ORF54	16p11.2	0.6886352807447008	6.6505641176597454e-37	1.5771225990549117e-34
LILRB4	19q13.42	0.6876099479659903	9.32349141877312e-37	2.185274610793137e-34
HLA-DRB6	6p21.32	0.6866308361388798	1.2856378048268681e-36	2.978689796769561e-34
SPI1	11p11.2	0.686182754823631	1.4886558684813757e-36	3.3928567240043545e-34
LST1	6p21.33	0.6861634884572236	1.4980614597231111e-36	3.3928567240043545e-34
LILRB3	19q13.42	0.6858174348759767	1.6773512936513092e-36	3.7567077806810486e-34
CRTAM	11q24.1	0.6851677232941447	2.073069062527326e-36	4.591961878391572e-34
IL4I1	19q13.33	0.6845377035380451	2.544405766561307e-36	5.5747377213669856e-34
SIT1	9p13.3	0.6834711403671883	3.5949828276822175e-36	7.791835361031232e-34
ITGAL	16p11.2	0.6831305177761875	4.013301822512917e-36	8.605970727275837e-34
SERPINA1	14q32.13	0.6819019164106465	5.961987331235793e-36	1.2650081961654723e-33
CD80	3q13.33	0.6807619923427413	8.592541558768724e-36	1.8041652104177205e-33
HSPA7	1q23.3	0.6798181847822379	1.1614471924685098e-35	2.4135351606791496e-33
CD5	11q12.2	0.6796388593718272	1.2297336284726303e-35	2.510515806599579e-33
CD2	1p13.1	0.6796304636137124	1.2330260696202724e-35	2.510515806599579e-33
ACAP1	17p13.1	0.6794550878768607	1.3038254706200154e-35	2.6281210011287648e-33
ARHGAP9	12q13.3	0.6793431947488775	1.3510792503974526e-35	2.696406381214005e-33
C15ORF48	15q21.1	0.6790438250554648	1.4859831903997792e-35	2.9094243200255687e-33
CORO1A	16p11.2	0.679042343027279	1.48668306277042e-35	2.9094243200255687e-33
CD300A	17q25.1	0.6781279316370031	1.9868459708448258e-35	3.850851368684534e-33
TREML2	6p21.1	0.6762133078395748	3.63414027603371e-35	6.97651100419157e-33
SIGLEC7	19q13.41	0.6733288786028	8.948491555222253e-35	1.6972965843041403e-32
JAML	11q23.3	0.673306893950509	9.009809719727292e-35	1.6972965843041403e-32
THEMIS2	1p35.3	0.6728845159177247	1.0271784102736577e-34	1.917114371841307e-32
IL21R	16p12.1	0.6699708485055962	2.5223855587421027e-34	4.664561991519685e-32
LCP1	13q14.13	0.6699152724486512	2.5657274983579745e-34	4.7015790167637896e-32
FERMT3	11q13.1	0.6696596225867025	2.77476085801667e-34	5.038815731084867e-32
SLAMF1	1q23.3	0.6691809835425614	3.212321522954868e-34	5.781318298053686e-32
LILRB2	19q13.42	0.6685970083779054	3.839259455476175e-34	6.823789441165637e-32
CTSS	1q21.3	0.6685799650537748	3.859264753152169e-34	6.823789441165637e-32
ALOX5	10q11.21	0.6681405436968596	4.412118576475955e-34	7.733484708350073e-32
CXCR3	Xq13.1	0.6674070633847011	5.514139916931574e-34	9.581768819447391e-32
PILRA	7q22.1	0.6666881560753516	6.856737699490495e-34	1.181292835971196e-31
WDFY4	10q11.23	0.6660916397308041	8.211933182822167e-34	1.3992121900833166e-31
FUT7	9q34.3	0.66607212624957	8.260467858308016e-34	1.3992121900833166e-31
PSTPIP1	15q24.3	0.66560998057061	9.496415219664575e-34	1.595160346523157e-31
CD300C	17q25.1	0.6637670785222998	1.6518222128721237e-33	2.7517173838730083e-31
SLA2	20q11.23	0.6630371796410817	2.0545000460036258e-33	3.394471920270089e-31
CD3E	11q23.3	0.6629704883727479	2.0957988451123962e-33	3.434554253734193e-31
HSPA6	1q23.3	0.6628837897239129	2.1507144609323303e-33	3.496125112017176e-31
CSF2RB	22q12.3	0.6627504071872447	2.2379852686234142e-33	3.6088855247713726e-31
AIM2	1q23.1-q23.2	0.6608677485968104	3.9150719218605975e-33	6.26318291499556e-31
CD72	9p13.3	0.6602487436106059	4.701272371033059e-33	7.461696628575856e-31
FCGR3A	1q23.3	0.6599182513253034	5.182879364935607e-33	8.161820262422425e-31
CTSZ	20q13.32	0.6590972077106956	6.600306025327544e-33	1.0313361903296692e-30
GMIP	19p13.11	0.6576055463422806	1.0220532087352426e-32	1.5847328098827913e-30
SP140	2q37.1	0.6573795370440354	1.0918262544051524e-32	1.679995558018676e-30
CLECL1	12p13.31	0.6567031348538779	1.3299642634830492e-32	2.0309158832596836e-30
C1ORF162	1p13.2	0.6564051035122584	1.4505227663142296e-32	2.1983599549320242e-30
SLA	8q24.22	0.6561916914535877	1.543416751041063e-32	2.3216904067712465e-30
GBP5	1p22.2	0.6552039196681441	2.055778202065038e-32	3.0695052754833314e-30
MAP4K1	19q13.2	0.6549252983693239	2.228474872081502e-32	3.302894705628444e-30
SDS	12q24.13	0.6547207784797651	2.3642793474467088e-32	3.478596993173964e-30
CTLA4	2q33.2	0.6545960863595052	2.4510512194820473e-32	3.570188746010174e-30
PCED1B-AS1	12q13.11	0.6545807268162632	2.4619548330377244e-32	3.570188746010174e-30
CD3G	11q23.3	0.6538821954074956	3.011830703848048e-32	4.336390821247507e-30
LCP2	5q35.1	0.6535277457906697	3.3355466712397456e-32	4.7684123583106065e-30
LY86	6p25.1	0.6518397156877125	5.413790977791255e-32	7.684914418263263e-30
APOC2	19q13.32	0.6515441412204589	5.891058858291614e-32	8.30392121724364e-30
TMEM156	4p14	0.6514496670813947	6.052189559771321e-32	8.471804510854896e-30
KYNU	2q22.2	0.6512231919626644	6.456377467416941e-32	8.97525521453264e-30
CTSD	11p15.5	0.6511802131452938	6.536034607304053e-32	9.023756820508754e-30
DOCK2	5q35.1	0.650846756803621	7.1879167922493e-32	9.856247536147561e-30
TYROBP	19q13.12	0.6502376432194994	8.548501440129067e-32	1.1642712400586594e-29
ITGB7	12q13.13	0.6497433868197304	9.836798810629754e-32	1.330740628361503e-29
DPEP2	16q22.1	0.6492261589830911	1.1390159189753476e-31	1.530609591919072e-29
AMPD3	11p15.4	0.6491876262502763	1.1515123854198423e-31	1.5371546458879313e-29
GRAP2	22q13.1	0.6482243079298883	1.5118773780823536e-31	2.004928441447763e-29
FCGR2C	1q23.3	0.6475397308673475	1.8335363242636269e-31	2.415594227985747e-29
CD6	11q12.2	0.6466437248703594	2.358366716035767e-31	3.086857006177464e-29
NAPSB	19q13.33	0.6465281266719126	2.4360646583971432e-31	3.1679842141491106e-29
TREML1	6p21.1	0.6459009928678966	2.90372049153993e-31	3.75194191974169e-29
TYMP	22q13.33	0.6443791858033557	4.4389628116387605e-31	5.699119324471496e-29
TAGAP	6q25.3	0.6438219432057161	5.182216035081144e-31	6.611261305008266e-29
IL18	11q23.1	0.6435225735123024	5.630906781947652e-31	7.138502390170994e-29
HLA-DQA2	6p21.32	0.6429653309146632	6.570497895889286e-31	8.277595380465022e-29
LTB	6p21.33	0.6426622561507873	7.144815444487548e-31	8.94522018102705e-29
PTPN6	12p13.31	0.642502938120877	7.466296566007428e-31	9.290008634630353e-29
LILRB1	19q13.42	0.6423110154708913	7.872563719714188e-31	9.735415147133674e-29
BATF	14q24.3	0.6422094965402051	8.096202575102856e-31	9.950924104045628e-29
LILRA6	19q13.42	0.6421791149624082	8.164341255905503e-31	9.973856163350741e-29
FYB1	5p13.1	0.6420651177369835	8.425091360067681e-31	1.0230395574993028e-28
IKZF1	7p12.2	0.6407956416515129	1.194621572258011e-30	1.4419153911380077e-28
GZMB	14q12	0.6405622222123418	1.2736138876009976e-30	1.52810923406984e-28
IGSF6	16p12.2	0.640472559507136	1.305307942206119e-30	1.5501777688679964e-28
TLR2	4q31.3	0.6404667500431287	1.3073881068986428e-30	1.5501777688679964e-28
KCNN4	19q13.31	0.6401620746023345	1.4211887827400866e-30	1.6752574440755513e-28
GPR183	13q32.3	0.6399479215295717	1.5069717334750503e-30	1.7660482111428252e-28
SIRPG	20p13	0.6389002515154443	2.006025992899967e-30	2.3373101698777245e-28
FCGR2B	1q23.3	0.6375875392529241	2.8662841665472323e-30	3.320441950867389e-28
HLA-DQB2	6p21.32	0.6371858931562379	3.195869325028887e-30	3.6694713055150945e-28
IRF5	7q32.1	0.6371765288232254	3.203983478546692e-30	3.6694713055150945e-28
CD4	12p13.31	0.6370186928214998	3.3438456236083156e-30	3.808016736444792e-28
MSR1	8p22	0.6361035404171312	4.281772361864336e-30	4.84874637629772e-28
LAIR1	19q13.42	0.6359182868939806	4.501071385509025e-30	5.068608710486336e-28
GZMH	14q12	0.6356572632417395	4.828980860803977e-30	5.407653733956987e-28
BIRC3	11q22.2	0.6349127307703132	5.899353886504629e-30	6.569794270180873e-28
ADGRE4P	19p13.2	0.6348187819464621	6.0500535050953706e-30	6.700600467154252e-28
GPSM3	6p21.32	0.6336907985316059	8.184489467772997e-30	9.015013890814223e-28
IL10RA	11q23.3	0.6332387799351169	9.23481927126351e-30	1.0116644133198835e-27
ITGAM	16p11.2	0.6332133322539335	9.29775074261912e-30	1.012931922044135e-27
RNASE6	14q11.2	0.6331935780754679	9.346893759002288e-30	1.012931922044135e-27
PLCB2	15q15.1	0.6328549346351465	1.0230305001311964e-29	1.102739347120028e-27
GPR84	12q13.13	0.6322915105519608	1.1886008421199321e-29	1.2743950624793336e-27
LCK	1p35.2	0.631996099301816	1.2857014757098467e-29	1.3712108278245174e-27
ARRDC5	19p13.3	0.6317959563741425	1.3558915645355086e-29	1.4384582245443287e-27
CCL5	17q12	0.6310483422773732	1.6531293235904688e-29	1.7446140196656065e-27
SIGLEC9	19q13.41	0.6305889135399577	1.8667663131381494e-29	1.959812946558629e-27
GFI1	1p22.1	0.6301252721838827	2.1099270061340073e-29	2.2036165110177817e-27
ANKRD22	10q23.31	0.6287918168301835	2.9971502521471925e-29	3.1141009088933485e-27
SNX20	16q12.1	0.6280835448928568	3.608926116287445e-29	3.7305191654362066e-27
NCKAP1L	12q13.13-q13.2	0.6279953642158368	3.6932346075327806e-29	3.798190305308075e-27
LOC606724	16p11.2	0.6276433825218483	4.049545042019197e-29	4.143486264567561e-27
FCGR1A	1q21.2	0.6275892884930893	4.1072294570873115e-29	4.181284048813583e-27
AOAH	7p14.2	0.6273632791948439	4.3571323529226355e-29	4.413402856173948e-27
CCR2	3p21.31	0.6268802541382513	4.942571846177576e-29	4.98137103517007e-27
CXORF21	Xp21.2	0.626649914801916	5.248422787411967e-29	5.263306374421046e-27
SAMSN1	21q11.2	0.6262636142814164	5.803787536509989e-29	5.791432939278804e-27
CD27	12p13.31	0.6256515366409238	6.804556436100096e-29	6.7566228612054e-27
CCL22	16q21	0.6250628271971252	7.926948758372694e-29	7.832524809927373e-27
LILRA4	19q13.42	0.6242268609097915	9.840526282494637e-29	9.67587747688997e-27
IL12RB1	19p13.11	0.6239365751100466	1.0606268266816248e-28	1.0378182012340539e-26
TMC8	17q25.3	0.6236811801686841	1.1328359192675522e-28	1.1031194987766208e-26
TIGIT	3q13.31	0.623403228210241	1.216936267269809e-28	1.1793165547768046e-26
LAT	16p11.2	0.6231439449515456	1.300923115156228e-28	1.2546749871867986e-26
GPR18	13q32.3	0.622575663614916	1.5055034259060938e-28	1.4450682169518634e-26
TREM2	6p21.1	0.6224592479299768	1.551171177822838e-28	1.4818463237618457e-26
APOBEC3H	22q13.1	0.621949985841279	1.767535198025455e-28	1.6805758012546744e-26
HCK	20q11.21	0.6214633249895147	2.0019927169769437e-28	1.8945618401926883e-26
HK3	5q35.2	0.6214403535526438	2.0137869521204005e-28	1.8968179249481734e-26
ITK	5q33.3	0.6211655523974052	2.1603018919185924e-28	2.0253583830420032e-26
SPNS3	17p13.2	0.6211365703566708	2.1763537189864002e-28	2.0286499667789687e-26
CXCR6	3p21.31	0.6211229440791862	2.183941274946848e-28	2.0286499667789687e-26
TBXAS1	7q34	0.6209290538287454	2.2947739372025047e-28	2.1218237730362794e-26
NCF1	7q11.23	0.6206615477413148	2.4568402474009947e-28	2.2613026879845592e-26
VAV1	19p13.3	0.6202984508359377	2.6950003580689385e-28	2.469232828072527e-26
ACP5	19p13.2	0.6197456543228537	3.101937738152405e-28	2.826571162640419e-26
APOC1	19q13.32	0.6197315750550939	3.1130564970291864e-28	2.826571162640419e-26
SLC46A2	9q32	0.6196784255217038	3.15538529812445e-28	2.8521570158876475e-26
UNC13D	17q25.1	0.6192869665995311	3.4851216116283624e-28	3.136142693106826e-26
LILRA2	19q13.42	0.6188224654025195	3.9206589304518163e-28	3.5123876471607675e-26
FCGR1CP	1q21.1	0.6182606620812715	4.519592129900748e-28	4.031036219575637e-26
MNDA	1q23.1	0.6182362086162154	4.54761580617493e-28	4.038162634584496e-26
SLC37A2	11q24.2	0.6175907853415549	5.352465715971669e-28	4.732002256001796e-26
S1PR4	19p13.3	0.616904606291802	6.362291558700964e-28	5.600205718285386e-26
OLR1	12p13.2	0.6163736147113573	7.270615500904861e-28	6.371904202249534e-26
PTAFR	1p35.3	0.616259924031235	7.481112453736686e-28	6.527999295669713e-26
CD68	17p13.1	0.6160405838598237	7.904333798276811e-28	6.867571395339038e-26
UBASH3A	21q22.3	0.615646682021158	8.72443675804745e-28	7.547573894075643e-26
CLEC4E	12p13.31	0.6154615676795159	9.138277300126604e-28	7.871805792250085e-26
NLRP3	1q44	0.6154107218811089	9.255296048418287e-28	7.938680955232655e-26
CXCL16	17p13.2	0.6153714481342006	9.34669230606689e-28	7.983104949719928e-26
GPR171	3q25.1	0.6151151992131323	9.96525023257529e-28	8.475508394009287e-26
STAT4	2q32.2-q32.3	0.6150794885817138	1.0054595146250942e-27	8.515566149705051e-26
SIRPB2	20p13	0.6138657074980252	1.3609018022073832e-27	1.147769775192227e-25
GZMA	5q11.2	0.61379605217332	1.3846938370789265e-27	1.1629697364166635e-25
ZNF683	1p36.11	0.6136496349717742	1.4360499345663777e-27	1.2010978643591068e-25
FCER1G	1q23.3	0.6134344372961292	1.5149556415412323e-27	1.261857887047381e-25
GPR132	14q32.33	0.6125879421794109	1.868983985777928e-27	1.550333753140975e-25
RASSF4	10q11.21	0.6122428866352181	2.0356579528304977e-27	1.681670383410014e-25
IGFLR1	19q13.12	0.6122006488319386	2.057040988335721e-27	1.6923989878319645e-25
SYK	9q22.2	0.6113625618932018	2.5301620279924318e-27	2.0731900812294084e-25
NME8	7p14.1	0.6108292381141408	2.8855000232363442e-27	2.354778298314777e-25
ATP6V1B2	8p21.3	0.6106215478005959	3.0368089621025346e-27	2.468264445528258e-25
CD247	1q24.2	0.6105237339403724	3.110752206479629e-27	2.5182101295586296e-25
ABI3	17q21.32	0.6101072840203275	3.445940301572777e-27	2.7783927463520987e-25
NCF2	1q25.3	0.6097278848049129	3.782152145170105e-27	3.0373243342706693e-25
CCRL2	3p21.31	0.6094655658161305	4.033310052322163e-27	3.2261678858991204e-25
FCGR1B	1p11.2	0.6087126954980424	4.8490539022797964e-27	3.8633351584290064e-25
CD96	3q13.13-q13.2	0.6084748299743161	5.1390970025457226e-27	4.078298357492682e-25
CYTH4	22q13.1	0.6073144019052956	6.818146243265321e-27	5.389544071588199e-25
CSTA	3q21.1	0.606660827475617	7.990913442776434e-27	6.291907901017366e-25
SRGN	10q22.1	0.6063088457816292	8.702674460630474e-27	6.825673505950524e-25
ITGAD	16p11.2	0.6061322327220366	9.082994400138693e-27	7.096353415643242e-25
ZMYND15	17p13.2	0.604826076582324	1.2452388585296773e-26	9.686765249217835e-25
PIK3AP1	10q24.1	0.6048119973145653	1.2494711339964463e-26	9.686765249217835e-25
SELL	1q24.2	0.6044585335923923	1.3604934165062688e-26	1.0507075017822553e-24
FCGR2A	1q23.3	0.6042139989418317	1.442933717778146e-26	1.1101227079867973e-24
LACTB	15q22.2	0.6041613869412571	1.461304131609978e-26	1.119981269234309e-24
FGD2	6p21.2	0.6039227804034373	1.5475522766009956e-26	1.1815913348275101e-24
CARD9	9q34.3	0.6030061459708838	1.9280810494772497e-26	1.4665784797853932e-24
PIK3CD	1p36.22	0.6028082952081578	2.0215931105694536e-26	1.5319267793138525e-24
FCRL6	1q23.2	0.6024897799910616	2.181606244889507e-26	1.6469901527429886e-24
CCL4	17q12	0.6013744329389656	2.846626514930495e-26	2.1410242784124623e-24
TLR8	Xp22.2	0.6005711736625805	3.4456503049064035e-26	2.5819320890705715e-24
IRF8	16q24.1	0.60037184087167	3.6125774412521885e-26	2.6969897586414947e-24
HCST	19q13.12	0.6001917744471659	3.770204696536196e-26	2.8042810357225133e-24
CLEC4D	12p13.31	0.59971940595374	4.216631825753841e-26	3.124803224695595e-24
ARL11	13q14.2	0.5991751031121108	4.795875279488057e-26	3.541042417898929e-24
LTA	6p21.33	0.5990122643506101	4.983923894458581e-26	3.666458173014658e-24
CCDC88B	11q13.1	0.5984318659772271	5.715175171721001e-26	4.189119488595644e-24
TNFSF8	9q32-q33.1	0.5980862555864885	6.19980182943948e-26	4.52787701000042e-24
DOK3	5q35.3	0.5980087469303484	6.313924062056262e-26	4.5945764375042625e-24
HTRA4	8p11.22	0.5978514024971638	6.551996841448262e-26	4.7506690767292306e-24
CD33	19q13.41	0.5973062655705587	7.447260929083621e-26	5.380445826076651e-24
PARP15	3q21.1	0.5969876183537488	8.025287377560975e-26	5.7773470596248775e-24
HCLS1	3q13.33	0.5963629546306699	9.289600374922949e-26	6.663717962894017e-24
ALOX15B	17p13.1	0.5958437112941544	1.0488308728226255e-25	7.496909185633213e-24
HMOX1	22q12.3	0.5958108991316794	1.0568978627074582e-25	7.527876402330117e-24
NPL	1q25.3	0.5956241635803428	1.1039846896801742e-25	7.835570207705377e-24
TMEM52B	12p13.2	0.5950338015675742	1.2668612185054016e-25	8.960042660145046e-24
BTLA	3q13.2	0.5948827695018619	1.3121974654230411e-25	9.248239269416868e-24
ARHGAP15	2q22.2-q22.3	0.5942206828889474	1.5305408640538122e-25	1.0749516444854597e-23
CLEC5A	7q34	0.5933969031537091	1.852680833147118e-25	1.2966835956161964e-23
C3AR1	12p13.31	0.5928431376907919	2.1058719339380645e-25	1.468791023266075e-23
LILRA1	19q13.42	0.5926170765010597	2.2187649937840563e-25	1.5421946889553524e-23
ADGRG5	16q21	0.5922730084426268	2.4021237015131635e-25	1.663904036130613e-23
FASLG	1q24.3	0.5921631309075125	2.463764010737845e-25	1.700756546727491e-23
TNIP3	4q27	0.5918836768355992	2.627642283232205e-25	1.8076923379901558e-23
FGD3	9q22.31	0.591473002633564	2.8881273966918556e-25	1.980135507997202e-23
PRF1	10q22.1	0.5912996053358937	3.005600058018411e-25	2.053690859982275e-23
LRRC25	19p13.11	0.5904555902844156	3.6480675745252773e-25	2.4842600709360142e-23
CLEC12A	12p13.31	0.5904141673598164	3.682863169342115e-25	2.493218885766163e-23
ASGR2	17p13.1	0.5904104978004017	3.685961343247093e-25	2.493218885766163e-23
ARHGDIB	12p12.3	0.5903436971564325	3.7428112592897447e-25	2.523205570351284e-23
UBD	6p22.1	0.5903149069647473	3.7675782947962685e-25	2.5314358562736126e-23
ZAP70	2q11.2	0.5899064988417954	4.13679824169833e-25	2.770280470362566e-23
CCR1	3p21.31	0.5893685226105629	4.677995314317801e-25	3.122329521546487e-23
HLA-A	6p22.1	0.5887883085760521	5.339934861849116e-25	3.552378449184576e-23
LINC00426	13q12.3	0.5883383601735993	5.916005009720986e-25	3.922661611215326e-23
DCANP1	5q31.1	0.5878950388218287	6.543318663294457e-25	4.324382763804143e-23
ZBP1	20q13.31	0.5877167794440538	6.813635059805757e-25	4.4883150947877334e-23
THEMIS	6q22.33	0.5875344181851259	7.101547530320061e-25	4.6627326895329467e-23
CALHM6	6q22.1	0.5869491115982046	8.108980010094727e-25	5.306906170892189e-23
SIGLEC5	19q13.41	0.5868705641043882	8.254466175366386e-25	5.384636721581237e-23
TNFAIP8L2	1q21.3	0.5867653401032381	8.453397563555554e-25	5.49661724801901e-23
CYP2S1	19q13.2	0.5863792717609899	9.224549149054389e-25	5.978753607636313e-23
FBP1	9q22.32	0.585590091752365	1.10227373082948e-24	7.121324228310842e-23
MCOLN2	1p22.3	0.5850224749574279	1.2525328226669698e-24	8.066231343929109e-23
TREM1	6p21.1	0.5846128310564559	1.3733310597241334e-24	8.815998143585783e-23
INPP5D	2q37.1	0.5844489300497512	1.424813812914286e-24	9.117451437115323e-23
C5AR1	19q13.32	0.5836723472807006	1.695759510376827e-24	1.0816906471729652e-22
HSH2D	19p13.11	0.583639742660626	1.7081820001582303e-24	1.0861774314570804e-22
ST14	11q24.3	0.5820169217978183	2.4539112448471096e-24	1.555455627747899e-22
PTPRCAP	11q13.2	0.5816923576252574	2.6376580828248656e-24	1.666685704561154e-22
SNAI3	16q24.2	0.5815789824690876	2.7049836750220554e-24	1.7038861230443617e-22
AIF1	6p21.33	0.5806238153037196	3.343605355244279e-24	2.099596671204328e-22
DOK2	8p21.3	0.5803111073566394	3.5833183328513284e-24	2.243135019729324e-22
SCIMP	17p13.2	0.5801114634225648	3.7451266901912786e-24	2.337167761429895e-22
NKG7	19q13.41	0.5781562383753406	5.762687723003589e-24	3.5851387787834365e-22
S100B	21q22.3	0.5779856487747902	5.982667557878995e-24	3.7105424604359047e-22
TNFRSF13B	17p11.2	0.577571451962193	6.551773224006647e-24	4.0510457937515945e-22
SLC15A3	11q12.2	0.5773215929508896	6.92050756703795e-24	4.265953242470458e-22
GALNT6	12q13.13	0.577069170701488	7.313753702421932e-24	4.494613822552405e-22
TBX21	17q21.32	0.5770381550079602	7.36356504338439e-24	4.51147053433128e-22
VAMP8	2p11.2	0.5767468295712046	7.84803687771355e-24	4.793723616487031e-22
PDE6G	17q25.3	0.5766504977391661	8.01503632740205e-24	4.8809391918865e-22
IL15	4q31.21	0.5762710985237515	8.70745618309221e-24	5.286632357909327e-22
GNGT2	17q21.32	0.5760829876656425	9.072274724956395e-24	5.491586835764146e-22
C9ORF139	9q34.3	0.5755402032425739	1.0211388356974028e-23	6.162603446452859e-22
CASS4	20q13.31	0.5753944788521981	1.0540465356284625e-23	6.342213736914304e-22
CD180	5q12.3	0.5749543164811906	1.1599137196131991e-23	6.958446680429539e-22
RASGRP1	15q14	0.5735730662125731	1.5647911984712852e-23	9.354261134265104e-22
GNA15	19p13.3	0.5735619510011842	1.56855695955827e-23	9.354261134265104e-22
SOWAHD	Xq24	0.5727334972456505	1.875833388147446e-23	1.1153738526515655e-21
SMAP2	1p34.2	0.5721866288453078	2.110379077909702e-23	1.2511444433360547e-21
XCL2	1q24.2	0.5718765813385422	2.2559364457642864e-23	1.3335164497733348e-21
GNLY	2p11.2	0.571271211763907	2.5691873563125996e-23	1.5142429690407332e-21
GZMK	5q11.2	0.5711683686627613	2.62650010101503e-23	1.5435091118413982e-21
TRAT1	3q13.13	0.5710623959210572	2.6868729982147136e-23	1.5743982274713367e-21
ADA2	22q11.1	0.5704244973330901	3.080224178086045e-23	1.79965445674436e-21
ARRB2	17p13.2	0.5703400217265332	3.1363917821899274e-23	1.82717483102897e-21
ST18	8q11.23	0.5701597486653118	3.259646877040687e-23	1.893507265144355e-21
HLA-E	6p22.1	0.5700843718645838	3.312585059892464e-23	1.918729225639437e-21
CD69	12p13.31	0.5700243497230825	3.3553437405245475e-23	1.937927328875453e-21
CD8A	2p11.2	0.5695263882528516	3.7316713727720933e-23	2.149122853170488e-21
CD244	1q23.3	0.5692399293229216	3.966667573926122e-23	2.2779520879666334e-21
F5	1q24.2	0.5691130623467703	4.075339619248078e-23	2.3337108154881683e-21
SLC11A1	2q35	0.5690795567550104	4.1045256100819285e-23	2.3437655162159045e-21
ALOX5AP	13q12.3	0.5688024174843757	4.353955263490846e-23	2.479171645372457e-21
NCF1C	7q11.23	0.5683155712255334	4.828737295579812e-23	2.7417706385071063e-21
TNFSF13B	13q33.3	0.5676261627671192	5.589312083992286e-23	3.1647124628379923e-21
LPAR5	12p13.31	0.5668639246181184	6.567817781274669e-23	3.7083334178474365e-21
ADGRE1	19p13.3-p13.2	0.566760875266144	6.712421127997716e-23	3.779393091537708e-21
UPP1	7p12.3	0.566305199992293	7.390307040664531e-23	4.149482423918522e-21
HLA-DPB2	6p21.32	0.5662604290430764	7.460437308744475e-23	4.177223189787844e-21
IL7R	5p13.2	0.5661630287329343	7.61527706581521e-23	4.252109136167235e-21
RHOG	11p15.4	0.5651655203178654	9.394713794630666e-23	5.231194639733987e-21
TNFRSF14	1p36.32	0.5646638537771718	1.0438362386702271e-22	5.7963104856407075e-21
RUFY4	2q35	0.5645186514422045	1.0761167843942814e-22	5.959144511822948e-21
ABCC3	17q21.33	0.5644015347883881	1.1028673274624365e-22	6.090547046482283e-21
SLC7A7	14q11.2	0.564314836139554	1.1230904937739972e-22	6.1852828095635146e-21
PLA2G2D	1p36.12	0.5634561210494832	1.344162367041511e-22	7.382637829007013e-21
ICAM3	19p13.2	0.5633789353405917	1.3660135077006334e-22	7.48226474856567e-21
PYHIN1	1q23.1	0.5630670066228741	1.457936078593643e-22	7.964123993553406e-21
MLKL	16q23.1	0.5629617444064552	1.4903085188919568e-22	8.118959139271669e-21
HLA-C	6p21.33	0.5628691176448791	1.5193792500933806e-22	8.255020901383362e-21

## Sheet: Table S2 CD8A
Sarcoma (TCGA, PanCancer Atlas)
https://www.cbioportal.org (accessed date February 2021)
Samples with mRNA data (RNA Seq V2) (253 patients/samples) - CD8A
Correlated Gene	Cytoband	Spearman's Correlation	p-Value	q-Value
CD3E	11q23.3	0.9081876129120219	6.38537331539073e-97	1.2870996991833094e-92
CD2	1p13.1	0.9034675205126785	2.5400864858180094e-94	2.560026164731681e-90
SIRPG	20p13	0.8986944525708438	7.956709769494735e-92	5.346113294123512e-88
LCK	1p35.2	0.893610383682277	2.6663612721471996e-89	1.3436461040667775e-85
CD27	12p13.31	0.8897919380630784	1.736461213015868e-87	7.000369734152171e-84
GZMK	5q11.2	0.88955662740135	2.234815937488132e-87	7.507864141991379e-84
CD3D	11q23.3	0.8885736696106539	6.3723787397514115e-87	1.834971975102417e-83
SLA2	20q11.23	0.8872206191617346	2.6530756464989577e-86	6.684755725809936e-83
CXCR6	3p21.31	0.8862104106200827	7.604938833409683e-86	1.7032528007226553e-82
THEMIS	6q22.33	0.8854889568776159	1.603512135325602e-85	3.232199411175816e-82
CD3G	11q23.3	0.8841535889867517	6.295425167060395e-85	1.1536080462948761e-81
UBASH3A	21q22.3	0.883879432273906	8.318811309559622e-85	1.3973523297232774e-81
TIGIT	3q13.31	0.8810097664626423	1.4755142562802655e-83	2.28784160491087e-80
CD5	11q12.2	0.880230633226183	3.180275747717196e-83	4.578915589052537e-80
CD8B	2p11.2	0.8709987749176907	1.9313436171606075e-79	2.5806104706413337e-76
CD96	3q13.13-q13.2	0.8709338704203478	2.048408370802269e-79	2.5806104706413337e-76
CXCR3	Xq13.1	0.8666146598179802	9.587500033156814e-78	1.1367955186373053e-74
ZNF831	20q13.32	0.8656699496242066	2.183983431571696e-77	2.4456974461217045e-74
CD247	1q24.2	0.8540202237566161	3.4408557342522754e-73	3.650385738701217e-70
FASLG	1q24.3	0.853401240336639	5.61561470145542e-73	5.659697276861845e-70
GZMA	5q11.2	0.8515963666597007	2.3128153807997454e-72	2.2199723633704985e-69
TRAT1	3q13.13	0.8475168074301483	5.297288247228653e-71	4.853519963608543e-68
SLAMF6	1q23.2-q23.3	0.8458366208121035	1.8732734838205348e-70	1.6417205918856746e-67
IL2RG	Xq13.1	0.8433814844290706	1.1547082982112566e-69	9.698106319601792e-67
ZAP70	2q11.2	0.8405848972435753	8.82645793937574e-69	7.116596507359872e-66
ICOS	2q33.2	0.8398817501528073	1.462841044123209e-68	1.1340956510150586e-65
ITGAL	16p11.2	0.8393266553143304	2.176011364344619e-68	1.6245133730034995e-65
GZMH	14q12	0.8364421099176926	1.6726997863401762e-67	1.204164628330676e-64
TBX21	17q21.32	0.8341815784974119	8.046156889355133e-67	5.592633945473497e-64
TBC1D10C	11q13.2	0.8341032469755513	8.492632358802263e-67	5.706199681879241e-64
SIT1	9p13.3	0.8329892866015317	1.824994156402016e-66	1.1866582971159819e-63
NKG7	19q13.41	0.832075832418181	3.402967614120437e-66	2.1435505686820514e-63
CXCL9	4q21.1	0.82857231778834	3.5875108252091437e-65	2.191316839507294e-62
PDCD1	2q37.3	0.8268902014768124	1.0907158130617446e-64	6.466340777613408e-62
PYHIN1	1q23.1	0.8266564526283201	1.2717608443373382e-64	7.32425238265935e-62
CCL5	17q12	0.8265871410342474	1.330951986680578e-64	7.452221998755669e-62
KLRK1	12p13.2	0.8252649542692476	3.1577056626437424e-64	1.7202668389705385e-61
ITK	5q33.3	0.8237184575714848	8.594962443898643e-64	4.559175210043814e-61
P2RY10	Xq21.1	0.8227520478138055	1.5989807202981019e-63	8.264270353602267e-61
SLAMF7	1q23.3	0.8196816307052528	1.1210669551942834e-62	5.649336653962793e-60
PTPRCAP	11q13.2	0.8159950855945377	1.1069022701742939e-61	5.4419095268056686e-59
ADGRG5	16q21	0.8158948882302471	1.1771341421384271e-61	5.649403072162923e-59
MAP4K1	19q13.2	0.8140514056296323	3.626450612755077e-61	1.6999619767745136e-58
LY9	1q23.3	0.8132612001009044	5.851673800656038e-61	2.680731563632358e-58
CD6	11q12.2	0.8123048354133595	1.041010141907964e-60	4.6630314289864065e-58
SH2D1A	Xq25	0.8116066229935626	1.5819626474619744e-60	6.9320915401937e-58
CD52	1p36.11	0.8077972466880381	1.5051481923680685e-59	6.455164279481522e-57
ACAP1	17p13.1	0.8068724611004653	2.581067781024986e-59	1.08388715129418e-56
EOMES	3p24.1	0.8062939426349496	3.611415125069428e-59	1.4856182586943767e-56
CCR5	3p21.31	0.8059009916250586	4.534011495294378e-59	1.8278413942129754e-56
SPN	16p11.2	0.8029109997613939	2.5174729892782045e-58	9.949941773506033e-56
BTLA	3q13.2	0.8019428684500124	4.357960223605043e-58	1.689296235138593e-55
SLAMF1	1q23.3	0.8014223342664727	5.846208273403002e-58	2.2234343427732886e-55
CD48	1q23.3	0.8000721747726197	1.2475509273411745e-57	4.656830378225195e-55
GPR171	3q25.1	0.799994886994002	1.3026432057711535e-57	4.7740689270416624e-55
CST7	20p11.21	0.7974845535612397	5.247446651782203e-57	1.8887996814281047e-54
CTLA4	2q33.2	0.7951440290809576	1.8901518605822645e-56	6.684173869080123e-54
FCRL3	1q23.1	0.7950147155407121	2.0278433700229797e-56	7.047454967164346e-54
DTHD1	4p14	0.7939927051563648	3.528695312596876e-56	1.2055578206104276e-53
ZBP1	20q13.31	0.7935393825650451	4.507024670359119e-56	1.514134938007146e-53
GRAP2	22q13.1	0.7921522161508463	9.493918491144787e-56	3.1371953282951714e-53
ITGB7	12q13.13	0.7908465493196749	1.9043383837716117e-55	6.191249806723286e-53
GFI1	1p22.1	0.7897001226008803	3.494612672077903e-55	1.118109644937687e-52
GBP5	1p22.2	0.7885064268152255	6.54909092104149e-55	2.0626566514911452e-52
LINC00426	13q12.3	0.7884007379733319	6.922258755527002e-55	2.1466456882331966e-52
CTSW	11q13.1	0.7851651942716648	3.7189594239543415e-54	1.1358040167976918e-51
C16ORF54	16p11.2	0.7828990123017991	1.1867239694624903e-53	3.5702679182769284e-51
CARMIL2	16q22.1	0.7785264490160074	1.0709135864926571e-52	3.1744713474900723e-50
RASGRP1	15q14	0.7772763582417811	1.990208717395403e-52	5.81400537920857e-50
IKZF1	7p12.2	0.7748888108354042	6.42850073628752e-52	1.8511327048763936e-49
XCL2	1q24.2	0.7730106270133105	1.600674316866931e-51	4.544336930293905e-49
LTA	6p21.33	0.7720921978001475	2.4926263539967555e-51	6.97831519687675e-49
IFNG	12q15	0.7692518136695768	9.680168148918407e-51	2.6729198544897035e-48
UBD	6p22.1	0.7688167132795625	1.1895869652791518e-50	3.240338440423225e-48
PRF1	10q22.1	0.7673860431477686	2.3353326993161244e-50	6.276440162682015e-48
RHOH	4p14	0.765862518173371	4.764429556283503e-50	1.2636395600790338e-47
HLA-DPA1	6p21.32	0.7639907165754478	1.1356695915116515e-49	2.9729470072857607e-47
CRTAM	11q24.1	0.7628572667138936	1.914201698373003e-49	4.946738927449311e-47
SKAP1	17q21.32	0.7628169502527596	1.9499757718291838e-49	4.972594828393987e-47
TRAF3IP3	1q32.2	0.762790785562166	1.973545598410076e-49	4.972594828393987e-47
CXCL10	4q21.1	0.7612689718133059	3.958969553384916e-49	9.851969047849352e-47
FYB1	5p13.1	0.7599326936775125	7.264368698607334e-49	1.785705851924732e-46
PTPN7	1q32.1	0.7584182905990502	1.4383896870000492e-48	3.4932073398626493e-46
TARP	7p14.1	0.7580231019444371	1.717655339449258e-48	4.121759366342701e-46
GPR18	13q32.3	0.7569094467497908	2.826815722986965e-48	6.703544062146854e-46
S1PR4	19p13.3	0.7535727994474996	1.2376859246819864e-47	2.9009343236993954e-45
IL12RB1	19p13.11	0.7534110274403253	1.3287476226557252e-47	3.078570785042696e-45
CXCL11	4q21.1	0.753251767145075	1.4248609822393755e-47	3.263741229431715e-45
PTPRC	1q31.3-q32.1	0.7527762092979482	1.7546945824186352e-47	3.974087494136228e-45
DCANP1	5q31.1	0.7524129585284406	2.0565368206370992e-47	4.605956965953556e-45
TESPA1	12q13.2	0.7513836269032688	3.2197848884115323e-47	7.132000439089148e-45
CD38	4p15.32	0.7508276671950235	4.098131443121005e-47	8.978916902064141e-45
RGL4	22q11.23	0.7495931744044796	6.985750577706912e-47	1.514105101019766e-44
TMC8	17q25.3	0.7475483548746131	1.6784795043640314e-46	3.5992671669644443e-44
HLA-DOA	6p21.32	0.7472830718294603	1.8794800320413597e-46	3.9878609479850196e-44
CD74	5q33.1	0.744337540811351	6.536791880032373e-46	1.3725220200605474e-43
LTB	6p21.33	0.7435327995067814	9.1615298013442e-46	1.9038036722236605e-43
HLA-DRA	6p21.32	0.7419677777431977	1.759987597162203e-45	3.620007142448829e-43
HLA-DPB1	6p21.32	0.7418818201084547	1.823993916547289e-45	3.713762159176132e-43
CARD11	7p22.2	0.738478342381116	7.419418745998993e-45	1.495532236631017e-42
APOBEC3H	22q13.1	0.7379558874460848	9.184749266446103e-45	1.8330395144926146e-42
IL2RB	22q12.3	0.7377217669925648	1.0104960730476452e-44	1.996918563178567e-42
CD69	12p13.31	0.7373423677771497	1.1793412296266315e-44	2.3079593364644673e-42
HSH2D	19p13.11	0.7370874589292948	1.308158190648024e-44	2.535436985470406e-42
DENND1C	19p13.3	0.7346161769304528	3.5516211780146425e-44	6.818097912880109e-42
BIN2	12q13.13	0.7312260374567803	1.3728697500270888e-43	2.600768347912302e-41
LAX1	1q32.1	0.731211898777898	1.3805735636583635e-43	2.600768347912302e-41
BCL2L14	12p13.2	0.7300491947636134	2.18465842689712e-43	4.077422213978264e-41
CIITA	16p13.13	0.7299359319215527	2.284256707050577e-43	4.224198389359494e-41
PLA2G2D	1p36.12	0.7299058479544319	2.3114572718052516e-43	4.235640384343496e-41
LCP2	5q35.1	0.7286369342172149	3.802756933715885e-43	6.905601037199197e-41
RASAL3	19p13.12	0.7282249303817258	4.467224981638153e-43	8.039808388828595e-41
ZNF683	1p36.11	0.7272007127546884	6.658064320455421e-43	1.1846722664828493e-40
HLA-DMB	6p21.32	0.7271845465957072	6.7000366313957846e-43	1.1846722664828493e-40
SCML4	6q21	0.7258730719003897	1.1138615061512074e-42	1.9523570764773813e-40
CLEC9A	12p13.2	0.7257581552299229	1.16443029069212e-42	2.0233983939207814e-40
CCR2	3p21.31	0.7246433730078649	1.7892023069439438e-42	3.08247443598881e-40
ZBED2	3q13.13	0.7237290740225836	2.540817409417022e-42	4.340275976408382e-40
SEPTIN1	16p11.2	0.7232097470029678	3.09896064407315e-42	5.249222664082562e-40
ANKRD22	10q23.31	0.7207239117556118	7.9674356988324e-42	1.3383300115113723e-39
SASH3	Xq26.1	0.7203397994223053	9.210664428531853e-42	1.534374899883608e-39
XCL1	1q24.2	0.7182937081500687	1.9859255242892895e-41	3.281172196155673e-39
ARHGAP30	1q23.3	0.7181152751163025	2.1228582915776608e-41	3.478898746612269e-39
IL18RAP	2q12.1	0.7173985614679083	2.7733944427450357e-41	4.508331595355781e-39
CORO1A	16p11.2	0.7172245761769894	2.958958133928506e-41	4.7714975284477516e-39
HLA-DMA	6p21.32	0.7148733384611516	7.066166590860081e-41	1.1304184124759258e-38
HLA-DRB1	6p21.32	0.714710315360778	7.503327389553174e-41	1.1909021274899475e-38
PVRIG	7q22.1	0.7142805271870657	8.788129449701641e-41	1.383924416544031e-38
JAKMIP1	4p16.1	0.7127313499188352	1.5497850882291682e-40	2.421629304142275e-38
DENND2D	1p13.3-p13.2	0.7112105058013986	2.6949893682963732e-40	4.1786846689807687e-38
TAGAP	6q25.3	0.7106547452319446	3.2959161391999702e-40	5.07143371128655e-38
DAPP1	4q23	0.709234221216419	5.501515642243506e-40	8.401064454598663e-38
FCRL6	1q23.2	0.7089346454574567	6.1268294269584525e-40	9.285601560842221e-38
SELL	1q24.2	0.7076358538186678	9.755455765221918e-40	1.4674680735789417e-37
CD244	1q23.3	0.7075334225775095	1.011887830013236e-39	1.510860962190874e-37
HLA-DQA1	6p21.32	0.7066643843432612	1.3791923365208032e-39	2.044145582886017e-37
FGD2	6p21.2	0.7065828727930743	1.419757909518145e-39	2.088909502347244e-37
TTC24	1q22	0.7063959030345989	1.5173139380341255e-39	2.2162679020981067e-37
CCL4	17q12	0.7063257409029403	1.5556073796773395e-39	2.255854528932096e-37
BATF	14q24.3	0.7050134049449351	2.476156169798447e-39	3.5651342796162355e-37
NAPSB	19q13.33	0.7048955837042111	2.581357618976636e-39	3.6902429450859614e-37
STAT4	2q32.2-q32.3	0.7048400076472653	2.6325020965149926e-39	3.73685526475019e-37
NCR3	6p21.33	0.704800095865968	2.669847819415711e-39	3.763365209507866e-37
MZB1	5q31.2	0.7036197872604883	4.045247772585504e-39	5.662504121667083e-37
SP140	2q37.1	0.7026532750599854	5.6761457080270006e-39	7.890625450806914e-37
SNX20	16q12.1	0.7016788415282086	7.975679185984462e-39	1.101135379122526e-36
GZMM	19p13.3	0.7013876229898139	8.826673698197456e-39	1.2103351138405859e-36
CD7	17q25.3	0.7005769535725034	1.1697192613627186e-38	1.5931102129248863e-36
IL10RA	11q23.3	0.6989904424002336	2.0239927075039913e-38	2.7380953694736883e-36
ARHGAP9	12q13.3	0.6980145268402709	2.8308262814743084e-38	3.8040643570451754e-36
GVINP1	11p15.4	0.6979004106700101	2.943827837311096e-38	3.929717729581441e-36
FGD3	9q22.31	0.6978248272325643	3.021114598319234e-38	4.006355720942158e-36
CTSS	1q21.3	0.6972127495920712	3.725457992672497e-38	4.908108284856178e-36
AOAH	7p14.2	0.6970015605756793	4.004321889008375e-38	5.241241319268948e-36
KLHL6	3q27.1	0.6945287965486525	9.280483094220782e-38	1.2068819208400533e-35
SAMD3	6q23.1	0.6940278710220515	1.099181138040805e-37	1.420268858941571e-35
NLRC3	16p13.3	0.692509533146301	1.8320201570826679e-37	2.352103841166582e-35
IKZF3	17q12-q21.1	0.6924250820540747	1.8846467416465346e-37	2.4043559728714682e-35
TIFAB	5q31.1	0.6917951356808824	2.3272533309085293e-37	2.9503424774291337e-35
WDFY4	10q11.23	0.6913802276691697	2.673349609545294e-37	3.367919254975281e-35
CD37	19q13.33	0.6912698165693716	2.7737138487287817e-37	3.4726552825357793e-35
PCED1B-AS1	12q13.11	0.690141252106333	4.038814670486298e-37	5.02533255018471e-35
HLA-DQB1	6p21.32	0.6874684142743028	9.767504907841207e-37	1.2078748247077007e-34
CALHM6	6q22.1	0.6874395147246912	9.860702578009794e-37	1.2119645235667282e-34
CD40LG	Xq26.3	0.6861335885814658	1.5127745410684163e-36	1.8480603893524887e-34
GBP4	1p22.2	0.6831579352976135	3.977922296373874e-36	4.8302999836149505e-34
SLFN12L	17q12	0.6820713601395634	5.645922438672649e-36	6.814662191396681e-34
KCNA3	1p13.3	0.6820224285771346	5.7354555187144965e-36	6.8815224339719105e-34
PIK3R5	17p13.1	0.6815121429979362	6.756890326517198e-36	8.059091024355454e-34
JAML	11q23.3	0.6812268525722819	7.404206114807151e-36	8.779210744480457e-34
HLA-E	6p22.1	0.6804710181978246	9.430255284725272e-36	1.1116120220713878e-33
CYTIP	2q24.1	0.6796447874845682	1.2274141183227577e-35	1.4384294408739432e-33
LAMP3	3q27.1	0.6785606838670857	1.7322727852754223e-35	2.0183481232830458e-33
GPR65	14q31.3	0.6772520529795433	2.6204492109895634e-35	3.0356548704549785e-33
FLT3	13q12.2	0.6772298508208608	2.6388670609048666e-35	3.0395224769519657e-33
ITGAD	16p11.2	0.676473255301744	3.348992142755139e-35	3.8355474216770085e-33
GIMAP4	7q36.1	0.6759268744927639	3.9761514983926956e-35	4.5280952402882236e-33
ANO9	11p15.5	0.675412240110111	4.672329396769559e-35	5.2910193062182025e-33
SLAMF8	1q23.2	0.6753528338601946	4.7600643293960225e-35	5.36025791551037e-33
GIMAP7	7q36.1	0.6745162289496427	6.182901289776834e-35	6.923818961001758e-33
IRF8	16q24.1	0.6736648037572381	8.061220868092515e-35	8.977349670615514e-33
MYO1G	7p13	0.6735966304607177	8.233962271364483e-35	9.119339423290872e-33
WAS	Xp11.23	0.6735240110796428	8.421990359428884e-35	9.276615282787323e-33
CD72	9p13.3	0.673052726116745	9.749558584309209e-35	1.0680535455647865e-32
LCP1	13q14.13	0.6729549122565215	1.0049953496808956e-34	1.0950103385685304e-32
KLRB1	12p13.31	0.6729124390202131	1.0183221127553404e-34	1.0980885551254977e-32
CSF2RB	22q12.3	0.6729111924250578	1.0187158793891357e-34	1.0980885551254977e-32
IL21R	16p12.1	0.6728911850445569	1.025056292889617e-34	1.099045728498724e-32
EVI2B	17q11.2	0.6717300159614437	1.4681668329674427e-34	1.5632814855284063e-32
TLR8	Xp22.2	0.6717181597359617	1.473550043411208e-34	1.5632814855284063e-32
HCST	19q13.12	0.6709430589950954	1.8711884010787415e-34	1.9747405550023135e-32
MYO1F	19p13.2	0.670549580511922	2.111870365017538e-34	2.2171339035238808e-32
HLA-DRB5	6p21.32	0.6704821482294955	2.1560799305363637e-34	2.2518188165710614e-32
ZNF80	3q13.31	0.6704529055654811	2.175534717528068e-34	2.2604254278975912e-32
TMPRSS3	21q22.3	0.6700793524242461	2.4398397365708663e-34	2.5220435676953306e-32
MS4A1	11q12.2	0.6699518606888325	2.5371116163781625e-34	2.6092121862925826e-32
DOCK2	5q35.1	0.6698426530675764	2.6234706836781234e-34	2.684329876695428e-32
GZMB	14q12	0.6697366880523334	2.7100376260906503e-34	2.7589004257125877e-32
CD53	1p13.3	0.6696152857897479	2.8126860881205206e-34	2.8490107275500164e-32
JCHAIN	4q13.3	0.6665688528064432	7.108821154026012e-34	7.164625400085115e-32
SOWAHD	Xq24	0.6662376195070477	7.857668194574569e-34	7.877896697454379e-32
GIMAP5	7q36.1	0.6662220582111026	7.894702251752664e-34	7.877896697454379e-32
GPR174	Xq21.1	0.6659713233036886	8.515734456558625e-34	8.45574677048533e-32
NCF1	7q11.23	0.66588267375669	8.746649837038135e-34	8.642461802214592e-32
TMEM156	4p14	0.6657753485655549	9.034495918961413e-34	8.883333377488058e-32
ADA2	22q11.1	0.6647259507581313	1.2390629731509228e-33	1.2124171043593762e-31
LGALS2	22q13.1	0.6646070954989096	1.2840930385414099e-33	1.250408858834744e-31
CLEC12A	12p13.31	0.6645043791374717	1.3243072873937059e-33	1.2833683649997562e-31
C11ORF21	11p15.5	0.6641630177808119	1.4670933531931593e-33	1.4149378335078716e-31
INPP5D	2q37.1	0.6638374748610965	1.6173781627504043e-33	1.552451982217138e-31
TFEC	7q31.2	0.6629260275271914	2.1237855367313613e-33	2.0288694343077747e-31
HLA-DQB2	6p21.32	0.6615926924101901	3.158073549928246e-33	3.002702289901116e-31
RASSF5	1q32.1	0.6599063950998221	5.2010327895864944e-33	4.921935114539669e-31
VAV1	19p13.3	0.6583776830267757	8.15275940021922e-33	7.679213608888729e-31
EBI3	19p13.3	0.6568252585027665	1.2834699315155222e-32	1.2032978330027154e-30
RGS18	1q31.2	0.6561709430589955	1.552755312453044e-32	1.4490226311627782e-30
GPR132	14q32.33	0.6561025208007442	1.5839481336006162e-32	1.471319932211411e-30
BTK	Xq22.1	0.655910106098398	1.6750208389415268e-32	1.5487795894745116e-30
LYZ	12q15	0.6558656452528415	1.6967890201301893e-32	1.5617432090759921e-30
CXCL13	4q21.1	0.655733501857514	1.7631483721320932e-32	1.6154446244121184e-30
CCDC88B	11q13.1	0.6554195547690921	1.931250843491005e-32	1.7614580657125878e-30
SAMSN1	21q11.2	0.655166868963514	2.0779583293241913e-32	1.8867300019904382e-30
IRF1	5q31.1	0.6543658327294076	2.619621376305937e-32	2.367879286197254e-30
RAC2	22q13.1	0.6543109976865547	2.6614239562245443e-32	2.394925119893667e-30
NUGGC	8p21.1	0.6541769887579413	2.766373841718787e-32	2.4783021123344704e-30
IL18	11q23.1	0.65354775317117	3.316392883273212e-32	2.957899617174254e-30
DOCK8	9p24.3	0.6525288587938368	4.4442025629924987e-32	3.946334408028185e-30
LILRB1	19q13.42	0.6523999223417232	4.611544803639819e-32	4.076969675744203e-30
CCR4	3p22.3	0.6509567022498057	6.966189488808039e-32	6.131767752222867e-30
TNIP3	4q27	0.6508513991957164	7.178415197212966e-32	6.291100657835728e-30
NCF1C	7q11.23	0.650687438773711	7.521622978635983e-32	6.563348674474697e-30
SLA	8q24.22	0.6503206367978709	8.349146259416892e-32	7.254040566856305e-30
FOXP3	Xp11.23	0.6497063361151004	9.940751669071875e-32	8.599816798003509e-30
ADAM6	14q32.33	0.6492254179689984	1.1392549689579423e-31	9.813659149267198e-30
SCIMP	17p13.2	0.6486982966298211	1.3224753166822001e-31	1.1343461684409833e-29
CXCR2P1	2q35	0.6483591038149941	1.4554456657750537e-31	1.2431109442808372e-29
LILRB2	19q13.42	0.6480257161530699	1.5989715944838575e-31	1.3599354611819035e-29
PLCB2	15q15.1	0.6477537639810836	1.7263187446567082e-31	1.462075921682574e-29
PTPN6	12p13.31	0.6466592861663045	2.3480958850406647e-31	1.9803585253039613e-29
ARHGAP45	19p13.3	0.645077221078591	3.6547941383723745e-31	3.069570226965498e-29
P2RY13	3q25.1	0.6445814826506372	4.196032614979905e-31	3.5095198929522805e-29
ARRDC5	19p13.3	0.6433893962358259	5.842628816199093e-31	4.8665235143853346e-29
LST1	6p21.33	0.6416144622238432	9.538787596161696e-31	7.912483192421042e-29
LOC606724	16p11.2	0.6412750777694296	1.0472232161808498e-30	8.651179659244832e-29
GIMAP2	7q36.1	0.6410690758516848	1.1082183159433426e-30	9.117696569171411e-29
PIK3AP1	10q24.1	0.6406066830578984	1.2581806043453635e-30	1.0309409122678656e-28
PARVG	22q13.31	0.6403784507173758	1.3394105359727454e-30	1.09305660621873e-28
MCOLN2	1p22.3	0.6403451050832084	1.3517038069770652e-30	1.098640872469222e-28
MS4A6A	11q12.2	0.6390394382520368	1.9313441336600974e-30	1.5634579800074934e-28
SIGLEC10	19q13.41	0.638973487997795	1.9663820263587357e-30	1.5854545002125214e-28
CXORF65	Xq13.1	0.6387688816186765	2.079123659257732e-30	1.6696771155242274e-28
SELPLG	12q24.11	0.6381413291717987	2.4662024811174804e-30	1.972668389360518e-28
LGALS17A	19q13.2	0.6379337202722555	2.6092816289306925e-30	2.0788652092630818e-28
TLR10	4p14	0.6377777200278653	2.7221522958256798e-30	2.160252906573158e-28
CCR7	17q21.2	0.6366810096254998	3.6636134612918946e-30	2.895978687814146e-28
TTC16	9q34.11	0.6366447546160527	3.699688313015576e-30	2.913070989275585e-28
ITGB2	21q22.3	0.6362058003619114	4.165269212364485e-30	3.2669000588961448e-28
HLA-DOB	6p21.32	0.6357809293955577	4.670789393614625e-30	3.6479847695568274e-28
FCRL5	1q23.1	0.635767795339805	4.687344621298895e-30	3.6479847695568274e-28
IRF5	7q32.1	0.6349349611930917	5.864240188582308e-30	4.546364980048215e-28
PTPN22	1p13.2	0.6344125462578051	6.746589259433287e-30	5.210383130360029e-28
HLA-DQA2	6p21.32	0.6339131027593881	7.712072687508207e-30	5.93329195275202e-28
CCL22	16q21	0.6331757816424767	9.391385738419243e-30	7.197800849023448e-28
BLK	8p23.1	0.6329204668104863	1.0053158248873868e-29	7.67581480388449e-28
TMPRSS13	11q23.3	0.6328650367804352	1.0202797500468897e-29	7.7606712912057195e-28
ADAMDEC1	8p21.2	0.6326377381911765	1.0839729062495214e-29	8.214151079425414e-28
GPSM3	6p21.32	0.6324740533915474	1.1322536408015917e-29	8.547878890501005e-28
LAIR2	19q13.42	0.6322018234497541	1.2172897497450416e-29	9.155563240899554e-28
CD79A	19q13.2	0.6309334850930195	1.7041621333825954e-29	1.2769812684978801e-27
CLEC7A	12p13.2	0.630866793824685	1.7345038037258104e-29	1.2949034508037466e-27
TNFRSF13B	17p11.2	0.6276851987530383	4.0055015002764814e-29	2.979294971995315e-27
LAIR1	19q13.42	0.6270431611068379	4.7369386606543936e-29	3.5103850214268606e-27
KLRD1	12p13.2	0.6266916438003624	5.191662488263437e-29	3.833272555894729e-27
FGR	1p35.3	0.6263421617752329	5.686359933703562e-29	4.1832101161920695e-27
FAM78A	9q34.13	0.6254077430044567	7.248954969896973e-29	5.3133521937532106e-27
HLA-DRB6	6p21.32	0.6249732308462403	8.113063653446581e-29	5.925182031250823e-27
LAP3	4p15.32	0.6232943708123436	1.2515254537864476e-28	9.107219701073438e-27
GMIP	19p13.11	0.6229846269216347	1.355337422815763e-28	9.827171378308394e-27
LILRA4	19q13.42	0.6218029986470234	1.8353391246585583e-28	1.3259831804925647e-26
PARP15	3q21.1	0.6214982323085981	1.9842004935738212e-28	1.4284117624631257e-26
SH2D2A	1q23.1	0.6212862226213814	2.094713582016884e-28	1.5026029065022892e-26
STX11	6q24.2	0.6207334261082975	2.4122166683486225e-28	1.7242216802802548e-26
PATL2	15q21.1	0.6203377245828459	2.6681801665294576e-28	1.900441965255628e-26
CLECL1	12p13.31	0.6200418233026364	2.8769130167356483e-28	2.0418991436035374e-26
IGSF6	16p12.2	0.6195848542647583	3.2312895053550445e-28	2.2853720196295308e-26
ADAM28	8p21.2	0.6184740741399419	4.282138175191251e-28	3.0180090628437083e-26
HLA-DPB2	6p21.32	0.6184296014874637	4.330584214692929e-28	3.0415186765005356e-26
CD86	3q13.33	0.6183140150959389	4.459039135743441e-28	3.120862911777102e-26
GIMAP1	7q36.1	0.6178812628658574	4.974203377049726e-28	3.4693777671692496e-26
CXORF21	Xp21.2	0.6173601881880513	5.672820125404784e-28	3.943001216130491e-26
ZBTB32	19q13.12	0.6173318886566443	5.713414445977141e-28	3.9575702744866404e-26
HCK	20q11.21	0.6171609971678449	5.9647067479224175e-28	4.117486093077814e-26
EPHA1	7q34-q35	0.6170793437428984	6.088592526396581e-28	4.188660735651054e-26
CSF3R	1p34.3	0.616807533445671	6.519544828905858e-28	4.4698797658590264e-26
PSD4	2q14.1	0.6165326172173139	6.985984877112651e-28	4.7734405819647364e-26
RAB37	17q25.1	0.6162969747358655	7.411861975018222e-28	5.04732776454197e-26
TNFSF13B	13q33.3	0.6156379567496034	8.743521269440781e-28	5.9341130716538e-26
ADAP1	7p22.3	0.615512981825888	9.021433668737942e-28	6.102182498682908e-26
KLRG1	12p13.31	0.6151396246800078	9.904590983240545e-28	6.677151854487614e-26
DOK2	8p21.3	0.6146489593939095	1.1195913489326515e-27	7.522534273478486e-26
C1QB	1p36.12	0.6143704519093912	1.2001294337589584e-27	8.036880065209079e-26
CCR8	3p22.1	0.6142890334894049	1.2247342122098652e-27	8.174492554806044e-26
SNAI3	16q24.2	0.6139761185978234	1.3240119642242411e-27	8.807956819428392e-26
IL16	15q25.1	0.6133996096337758	1.5281213845970931e-27	1.0132349588593291e-25
PSTPIP1	15q24.3	0.6129149864172113	1.7234582860441884e-27	1.1390081531735314e-25
CD300LF	17q25.1	0.6120109492242324	2.15583915517013e-27	1.4201062042733435e-25
SLC12A3	16q13	0.6118658249401406	2.234565927551396e-27	1.467170859988713e-25
TLR2	4q31.3	0.6116961315537488	2.3302198767459844e-27	1.5250078589470392e-25
ASCL2	11p15.5	0.6109744040255757	2.784178705217206e-27	1.8162035650829522e-25
BCL2A1	15q25.1	0.6106637856038747	3.005416992404239e-27	1.9541996876094273e-25
CD4	12p13.31	0.6104177689251294	3.192860404156431e-27	2.0694047320444107e-25
POU2AF1	11q23.1	0.6103739311162283	3.2274498989708446e-27	2.0851188337677984e-25
IGFLR1	19q13.12	0.6094655658161302	4.033310052322539e-27	2.597425901746499e-25
ICAM3	19p13.2	0.6090305905437706	4.4864771691729005e-27	2.8800611560196864e-25
FAM30A	14q32.33	0.6089723597851417	4.5508317821999996e-27	2.912098928057314e-25
NCF1B	7q11.23	0.6088587880675325	4.6789757500321664e-27	2.9846238668796954e-25
KLRC3	12p13.2	0.6087868563018414	4.761969522182367e-27	3.0279816927012606e-25
BMS1P20	22q11.22	0.6086274788773933	4.9510597828521445e-27	3.138317988772034e-25
C1QC	1p36.12	0.60844741245289	5.1736084506284526e-27	3.2683334360770657e-25
SYTL1	1p36.11	0.608435556227408	5.188602964452354e-27	3.2683334360770657e-25
LILRB4	19q13.42	0.6081221072662356	5.6009297837110285e-27	3.5170698333415323e-25
IL27	16p12.1-p11.2	0.6077907460795459	6.071941166748966e-27	3.8009974564645626e-25
HAVCR2	5q33.3	0.6076960241629875	6.213613967834895e-27	3.877641385438018e-25
VNN2	6q23.2	0.607111476513472	7.162838619383448e-27	4.456214137373833e-25
CASP1	11q22.3	0.6059457488762519	9.502349495430237e-27	5.89350334705807e-25
GIMAP6	7q36.1	0.6055048454911519	1.0571206653167853e-26	6.536313267113632e-25
SIDT1	3q13.2	0.6053182220771585	1.1058539793053752e-26	6.816727419222767e-25
CSF2RA	Xp22.33 and Yp11.2	0.6052425265023691	1.1262456534131621e-26	6.921260254832045e-25
SPATC1	8q24.3	0.6051996032765259	1.1379729211762969e-26	6.972073000653683e-25
CD80	3q13.33	0.6047002162094368	1.2835797348294445e-26	7.840338398471852e-25
B2M	15q21.1	0.6046326719041548	1.3046330107605078e-26	7.944860301480228e-25
CLEC4D	12p13.31	0.6044848581424088	1.351900222398632e-26	8.207907464725669e-25
ETV7	6p21.31	0.6044652027192254	1.3583113184683218e-26	8.222066440350139e-25
C1ORF162	1p13.2	0.6044081446340951	1.377092399819981e-26	8.310793863224958e-25
SERPINA1	14q32.13	0.6037856927963055	1.599353531442786e-26	9.623334069639474e-25
HEATR9	17q12	0.6036691996290691	1.6447127441573327e-26	9.866807971422427e-25
LY75	2q24.2	0.6027771726162688	2.0367040850238517e-26	1.2182149626654533e-24
HCLS1	3q13.33	0.6020961806651639	2.3966601560877228e-26	1.4292745197118411e-24
RASSF4	10q11.21	0.6018768404937526	2.525429467829262e-26	1.5016248313579479e-24
PCED1B	12q13.11	0.6017064072524531	2.630171305369481e-26	1.5593047941862538e-24
PSMB9	6p21.32	0.6007601322561961	3.2944374655198447e-26	1.9473893252927718e-24
ARHGAP4	Xq28	0.6005193026760983	3.488342477068228e-26	2.055980096791353e-24
ARAP2	4p14	0.600483733999653	3.517917877189412e-26	2.067366491268425e-24
ALOX5	10q11.21	0.5988557260381976	5.171537329749122e-26	3.030310405690496e-24
GHRL	3p25.3	0.5987125969096939	5.349159199890016e-26	3.125304405570523e-24
HLA-B	6p21.33	0.598096186593276	6.185327265122269e-26	3.6034000486436294e-24
SPOCK2	10q22.1	0.5980546898040908	6.246031296926534e-26	3.62827818017718e-24
CEACAM21	19q13.2	0.5977021885489234	6.785927616202964e-26	3.9305730735575615e-24
NCKAP1L	12q13.13-q13.2	0.5972721789222993	7.507080475278818e-26	4.335822955306451e-24
PLCH2	1p36.32	0.5965708806441942	8.84837740223789e-26	5.095906951340261e-24
FPR3	19q13.41	0.5959465047106267	1.0239493575320688e-25	5.880269857485444e-24
FERMT3	11q13.1	0.595779035525698	1.0647901300512051e-25	6.097435980523335e-24
MPEG1	11q12.1	0.5957345746801411	1.0758996956724774e-25	6.143600613504285e-24
SPNS3	17p13.2	0.5955141273551121	1.1326925152528234e-25	6.449627974562476e-24
C1QA	1p36.12	0.5948031199657351	1.3367461835365458e-25	7.590082484942577e-24
ZC3H12D	6q25.1	0.5931599902484104	1.9571045614092438e-25	1.1081279956271384e-23
JAK3	19p13.11	0.5930113478898145	2.0255588786086399e-25	1.1436747987707103e-23
KMO	1q43	0.5918071999893297	2.674330887963473e-25	1.5057678130916123e-23
HLA-F	6p22.1	0.5914070523793219	2.932264451933308e-25	1.6463970628863422e-23
FUT7	9q34.3	0.5913015674118347	3.004244831988077e-25	1.682126752177324e-23
LAT2	7q11.23	0.5910647038685387	3.1722762667184377e-25	1.771290102721428e-23
IL15	4q31.21	0.5910283941780008	3.1988397569481434e-25	1.7811882038896055e-23
NFE2L3	7p15.2	0.590827579358904	3.349756677982928e-25	1.860083894162586e-23
TNFRSF17	16p13.13	0.5899295154465004	4.1150741404206695e-25	2.278778831001633e-23
SLC15A3	11q12.2	0.5892074611981891	4.853177339777441e-25	2.6801505654217505e-23
SEMA4A	1q22	0.5883918660365082	5.844418471095353e-25	3.2187416153516126e-23
UNC13D	17q25.1	0.5882695987112286	6.009271404086344e-25	3.3005145420209386e-23
P2RY8	Xp22.33 and Yp11.2	0.588018394933835	6.362470002223407e-25	3.485008365076555e-23
CYBB	Xp21.1-p11.4	0.5879050197776662	6.528499582762307e-25	3.5662592436243854e-23
LYN	8q12.1	0.587706428000848	6.829665680273842e-25	3.7206911112778334e-23
STAT1	2q32.2	0.587683456563977	6.865372862405192e-25	3.730062554919177e-23
